# Supplementary material
Source: MDPI journal article supplement (https://www.mdpi.com/2227-7099/9/4/179)
Supplement: s1 [file s1]

The following are available online at <https://www.mdpi.com/article/10.3390/economies9040179/s1>.  
Table S1: Hausman test results: FDI—ADRL model, Table S2: Hausman test results: FPI—ADRL model, Table S3: Hausman test results: INSTDEX—ADRL model.

**Table S1.** Hausman test results: FDI—ADRL model.

|                                                                                                                                                                                                                                                                                                |           |            |                      |         |
|------------------------------------------------------------------------------------------------------------------------------------------------------------------------------------------------------------------------------------------------------------------------------------------------|-----------|------------|----------------------|---------|
| .hausman mg DFE, sigmamore                                                                                                                                                                                                                                                                     |           |            |                      |         |
| Coefficients                                                                                                                                                                                                                                                                                   |           |            |                      |         |
| (b)                                                                                                                                                                                                                                                                                            | (B)       | (b-B)      | sqrt (diag(V_b-V_B)) |         |
| Mg                                                                                                                                                                                                                                                                                             | DFE       | difference | S.E.                 |         |
| fpi                                                                                                                                                                                                                                                                                            | -.0075674 | -.0306964  | .023129              | 1.74297 |
| instdex                                                                                                                                                                                                                                                                                        | .4469476  | -.0211809  | .4681284             | 5.79422 |
| <p>b = consistent under Ho and Ha; obtained from xtpmg</p> <p>B = inconsistent under Ha, efficient under Ho; obtained from xtpmg</p> <p>Test: Ho: difference in coefficients not systematic</p> <p>Chi2 (10) = (b-B) ` [(V_b-V_B) ^ (-1)] (b-B)</p> <p>= 0.03</p> <p>Prob&gt;chi2 = 0.9850</p> |           |            |                      |         |
| Note: MG—Mean Group; DFE—Dynamic Fixed Effects Source: Authors' own compilation using Stata software.                                                                                                                                                                                          |           |            |                      |         |

**Table S2.** Hausman test results: FPI—ADRL model.

|                                                                                                                                                                                                                                                                                                 |           |            |                      |          |
|-------------------------------------------------------------------------------------------------------------------------------------------------------------------------------------------------------------------------------------------------------------------------------------------------|-----------|------------|----------------------|----------|
| .hausman DFE pmg, sigmamore                                                                                                                                                                                                                                                                     |           |            |                      |          |
| Coefficients                                                                                                                                                                                                                                                                                    |           |            |                      |          |
| (b)                                                                                                                                                                                                                                                                                             | (B)       | (b-B)      | sqrt (diag(V_b-V_B)) |          |
| DFE                                                                                                                                                                                                                                                                                             | pmg       | difference | S.E.                 |          |
| fdi                                                                                                                                                                                                                                                                                             | -.0136282 | -.0036419  | .0099863             | .0088953 |
| instdex                                                                                                                                                                                                                                                                                         | .8842183  | -.1099318  | .9941501             | .2245901 |
| <p>b = consistent under Ho and Ha; obtained from xtpmg</p> <p>B = inconsistent under Ha, efficient under Ho; obtained from xtpmg</p> <p>Test: Ho: difference in coefficients not systematic</p> <p>Chi2 (10) = (b-B) ` [(V_b-V_B) ^ (-1)] (b-B)</p> <p>= 20.07</p> <p>Prob&gt;chi2 = 0.0000</p> |           |            |                      |          |

Note: DFE—Dynamic Fixed Effects; PMG—Pooled Mean Group. Source: Authors' own compilation using Stata software.

**Table S3.** Hausman test results: INSTDEX—ADRL model.

|                                                                                                                                                                                                                                                                                               |              |          |            |                      |
|-----------------------------------------------------------------------------------------------------------------------------------------------------------------------------------------------------------------------------------------------------------------------------------------------|--------------|----------|------------|----------------------|
| .hausman pmg DFE, sigmamore                                                                                                                                                                                                                                                                   |              |          |            |                      |
|                                                                                                                                                                                                                                                                                               | Coefficients |          |            |                      |
|                                                                                                                                                                                                                                                                                               | (b)          | (B)      | (b-B)      | sqrt (diag(V_b-V_B)) |
|                                                                                                                                                                                                                                                                                               | pmg          | DFE      | difference | S.E.                 |
| fpi                                                                                                                                                                                                                                                                                           | .0630566     | .1347912 | -.0717346  | .4240175             |
| fdi                                                                                                                                                                                                                                                                                           | -.2791092    | .0046641 | -.2837733  | .8692791             |
| <p>b = consistent under Ho and Ha; obtained from xtpmg</p> <p>B = inconsistent under Ha, efficient under Ho; obtained from xtpmg</p> <p>Test: Ho: difference in coefficients not systematic</p> <p>Chi2 (10) = (b-B)' [(V_b-V_B) ^ (-1)] (b-B)</p> <p>= 0.11</p> <p>Prob&gt;chi2 = 0.9452</p> |              |          |            |                      |
| Note: PMG—Pooled Mean Group; DFE—Dynamic Fixed Effects. Source: Authors' own compilation using Stata software.                                                                                                                                                                                |              |          |            |                      |
